1 **A small RNA controls bacterial resistance to gentamicin during iron starvation**

2 Short title: RyhB promotes resistance to gentamicin

3

4 Sylvia Chareyre<sup>1</sup>, Frédéric Barras<sup>1,2</sup> and Pierre Mandin<sup>1\*</sup>

5

6 <sup>1</sup> : Aix Marseille Univ – CNRS, Laboratoire de Chimie Bactérienne, Institut de  
7 Microbiologie de la Méditerranée, 31 chemin Joseph Aiguier, 13009 Marseille,  
8 France

9 <sup>2</sup> : Département de Microbiologie, Institut Pasteur, 28 rue du Dr Roux, 75015  
10 Paris, France

11

12

13 \* : to whom correspondence should be addressed

14 pmandin@imm.cnrs.fr

15

16 **Keywords:** antibiotics resistance, ncRNAs, RyhB, Fe-S clusters, respiratory

17 complexes

18

## ABSTRACT

19

20 Phenotypic resistance describes a bacterial population that becomes  
21 transiently resistant to an antibiotic without requiring a genetic change. We here  
22 investigated the role of the small regulatory RNA (sRNA) RyhB, a key contributor to  
23 iron homeostasis, in the phenotypic resistance of *Escherichia coli* to various classes  
24 of antibiotics. We found that RyhB induces resistance to gentamicin, an  
25 aminoglycoside that targets the ribosome, when iron is scarce. RyhB induced  
26 resistance is due to the inhibition of respiratory complexes Nuo and Sdh activities.  
27 These complexes, which contain numerous Fe-S clusters, are crucial for generating a  
28 proton motive force (pmf) that allows gentamicin uptake. RyhB directly represses the  
29 expression of *nuo* and *sdh* operons by binding to their mRNAs, thereby inhibiting their  
30 translation. Indirectly, RyhB also inhibits the maturation of Nuo and Sdh by repressing  
31 synthesis of the Isc Fe-S biogenesis machinery. Notably, our study identifies *nuo* as a  
32 new direct RyhB target and shows that respiratory complexes activity levels are  
33 predictive of the bacterial sensitivity to gentamicin. Altogether, these results unveil a  
34 new role for RyhB in the adaptation to antibiotic stress, an unprecedented  
35 consequences of its role in iron starvation stress response.

36

37

38

## AUTHOR'S SUMMARY

39 Understanding the mechanisms at work behind bacterial antibiotic resistance has  
40 become a major health issue in the face of the antibiotics crisis. Here, we show that  
41 RyhB, a bacterial small regulatory RNA, induces resistance of *Escherichia coli* to the  
42 antibiotic gentamicin when iron is scarce, an environmental situation prevalent during  
43 host-pathogen interactions. This resistance is due to RyhB repression of the  
44 synthesis and post-translational maturation of the respiratory complexes Nuo and  
45 Sdh. These complexes are crucial in producing the proton motive force that allows  
46 uptake of the antibiotics in the cell. Altogether, these data point out to a major role for  
47 RyhB in escaping antibacterial action.

48

## Introduction

49

50       The emergence and spread of bacterial multi-resistance to antibiotics has  
51 become a major health issue in the last decades, urging for the development of new  
52 anti-bacterial molecules and for a better understanding of the molecular mechanisms  
53 at work behind bacterial resistance (1,2). While acquired resistance mechanisms  
54 (acquisition of genes or mutations that confer resistance) have long been the main  
55 focus of attention, less is known about “phenotypic” resistance, which is the process  
56 in which a bacterial population becomes transiently resistant to an antibiotic without  
57 requiring a genetic change (3–5). For instance, this kind of resistance has been  
58 associated with specific processes such as stationary growth phase, persistence and  
59 metabolic changes, reinforcing the idea that the environment encountered by the  
60 pathogen is a key determinant for antibiotic susceptibility (6).

61       Change in utilization of iron-sulfur (Fe-S) cluster biogenesis machineries in  
62 *Escherichia coli* gives a striking example of phenotypic resistance (7). Fe-S clusters  
63 are ubiquitous and ancient cofactors used in a plethora of biological processes, such  
64 as metabolism and respiration (8,9). In *E. coli*, Fe–S clusters are formed and brought  
65 to target proteins thanks to two dedicated biogenesis systems: the so called  
66 “housekeeping” Isc machinery, which homologs are found in mitochondria of  
67 eukaryotic organisms, and the stress-responsive Suf system, in which homologs are  
68 found in chloroplasts of plants (10,11). These systems are responsible for the  
69 maturation of more than 150 Fe-S cluster containing proteins in *E. coli*, notably  
70 numerous proteins contained in the main respiratory complexes I (Nuo) and II (Sdh)  
71 (12–14). Strikingly, it was shown that impairment of the *E. coli* Isc machinery

72 enhances resistance to aminoglycosides, a well-known class of antibiotics that target  
73 the ribosome (7). This resistance is due to a deficiency in the maturation of the  
74 respiratory complexes in *isc* mutants, which in turn leads to a decrease in the proton  
75 motive force (pmf) that is essential for aminoglycosides uptake (15). Incidentally, it  
76 was deduced from these results that the Suf machinery is unable to maturate  
77 efficiently the Fe-S cluster containing proteins of the respiratory complexes, although  
78 the molecular reason for this still remains unclear. Overall this study predicted that an  
79 environmental signal that induces the switch from *Isc* to *Suf* should induce a transient  
80 resistance to aminoglycosides.

81 Iron starvation is one signal that decreases the expression of the *isc* operon  
82 encoding the *Isc* pathway. The small RNA *RyhB* mediates this regulation.(16). *RyhB*  
83 is one of the most studied sRNAs to date in *E. coli* (17–19). *RyhB* is regulated by *Fur*,  
84 the main regulator of Fe-homeostasis in many bacteria and is expressed during iron  
85 starvation (20,21). When iron becomes limiting in the medium, *RyhB* base-pairs and  
86 represses the translation of more than 100 mRNA targets that encode for non-  
87 essential iron-utilizing proteins, thus engaging an “iron sparing” response and  
88 redirecting iron consumption in the cell (19). *RyhB* was shown to participate in the *Isc*  
89 to *Suf* transition during iron starvation by binding to the *iscRSUA* mRNA (16). In this  
90 way, it induces the degradation of the 3' part of the mRNA that contains *iscSUA*,  
91 encoding the *Isc* machinery, while the 5' part that encodes *iscR* remains stable. *IscR*  
92 is the major regulator of Fe-S clusters homeostasis and is itself a Fe-S cluster protein  
93 matured by *Isc* (22). Accumulation of *IscR* in its apo-form has been shown to  
94 induce the *suf* operon (23). By its differential regulation of the *isc* operon, *RyhB* thus

95 leads to the accumulation of apo-IscR that will turn on the expression of the  
96 alternative Suf system during iron starvation.

97         Iron homeostasis in particular has been shown to modify the sensitivity of  
98 bacteria to a number of antibiotics, although the molecular basis behind this is not  
99 always clear (24). Here we asked if the sRNA RyhB could participate in phenotypic  
100 resistance to various antibiotics during iron starvation. We found that RyhB is  
101 necessary to induce aminoglycoside resistance in low iron conditions. By further  
102 investigating the mechanism by which RyhB controls this phenotypic resistance, we  
103 show that RyhB controls entry of aminoglycosides in the cell by acting at both the  
104 synthesis and the maturation levels of the two pmf-producing respiratory complexes  
105 Nuo and Sdh.

106  
107  
108  
109  
110  
111  
112  
113  
114  
115  
116  
117  
118  
119  
120  
121  
122  
123  
124  
125  
126  
127  
128

## Results

### **RyhB is involved in resistance to the aminoglycoside gentamicin**

We first investigated the possible role of RyhB in resistance against different class of antibiotics during iron starvation. To do so, we performed antibiotic killing assays by growing wild type (WT) and *ryhB* mutant cells in LB medium starved or not for iron using 250  $\mu$ M of dipyrityl (DIP), a strong iron chelator. We chose this concentration of DIP because it is known to induce RyhB and we checked that it did not affect the growth of the cells (25,26). Antibiotics were added when cells reached early exponential phase ( $OD_{600}= 0.2$ ) and the number of survivors was determined by counting the number of colony forming units (c.f.u) after 3 hours of incubation. Four different major classes of antibiotics were tested: aminoglycosides (gentamicin),  $\beta$ -lactams (ampicillin), fluoroquinolones (norfloxacin), and tetracycline.

As expected, both WT and *ryhB* mutant cells were sensitive to the presence of all classes of antibiotics when grown in medium not starved for iron (Fig. 1A to D, left panels). Iron chelation did not protect cells against tetracycline (Fig. 1C). In contrast, adding DIP to the medium induced a protective effect on the WT and *ryhB* mutant strains for ampicillin and norfloxacin (Fig. 1A-B). The protective effect of iron deprivation for these antibiotics has already been observed and its underlying cause has been greatly debated (7,24,27,28). As cells were protected independently of *ryhB*, we did not pursue these antibiotics further. In contrast, WT cells were protected against gentamicin when DIP was added to the medium, but this protection effect was lost when cells were mutated for *ryhB*. This result thus suggested that RyhB is

129 involved in the protection of bacterial cells against aminoglycosides during iron  
130 starvation (Fig. 1D).

131 To further investigate this phenotype, we performed gentamicin kinetic killing  
132 assays by growing WT or *ryhB* mutant cells in presence of DIP and counting the  
133 number of surviving bacteria at different time intervals after addition of the antibiotic.  
134 In this experiment, both the WT and  $\Delta$ *ryhB* strains showed the same profile when  
135 grown in LB (Fig. 1E). In both cases, the majority of the cells were rapidly killed after  
136 1 h 30 min of incubation with gentamicin (5 logs of killing). Again, addition of DIP to  
137 the medium had a  $\approx$  4 log protective effect against gentamicin on WT cells as early as  
138 1 h 30 min post addition of the antibiotic. Cells then remained mainly resistant to  
139 gentamicin during the course of the experiment. In contrast, the *ryhB* mutant  
140 gradually became as sensitive as cells grown in the absence of DIP (see 4 h 30 min  
141 time point), although killing kinetics were slightly slower than in presence of iron.  
142 Finally, to better characterize the effect of RyhB on gentamycin efficacy during iron  
143 starvation, we performed minimum inhibitory concentration assays (MIC) by growing  
144 WT and *ryhB* mutants in presence of increasing concentration of gentamicin, with or  
145 without DIP. Growing cells in presence of DIP almost doubled the MIC of the WT cells  
146 (from 6  $\mu$ g/mL in LB to 10  $\mu$ g/mL in presence of DIP) (Figure S1). In sharp contrast,  
147 the protective effect allowed by DIP was completely lost in the *ryhB* mutant.  
148 Altogether, these results indicated that RyhB is needed for the phenotypic resistance  
149 of *E. coli* to gentamicin in low iron condition.

150

151 **The RyhB induced resistance to gentamicin is dependent on Nuo and Sdh**



152 Uptake of gentamicin has been shown to be a crucial step in the phenotypic  
153 resistance against this aminoglycoside (7). Entry of aminoglycosides is dependent on  
154 the proton motive force (pmf) mainly produced directly by respiratory complex I and  
155 indirectly by the respiratory complex II, respectively encoded by the *nuo* and *sdh*  
156 operon (12,15,29). Thus, one hypothesis was that RyhB induced resistance was due  
157 to an inhibitory effect on the activity of these two complexes that would block entry of  
158 gentamicin in the cell.

159 To test this hypothesis we repeated the previous killing assays in a strain  
160 deleted for both respiratory complexes ( $\Delta nuo \Delta sdh$ ). As expected, this mutant was  
161 resistant to gentamicin (Fig. 2, left panel) (7). Adding DIP to the medium somewhat  
162 increased by 1 log the survival of the *nuo sdh* mutant, suggesting that pmf might be  
163 even more decreased in these conditions. Nevertheless, deleting *ryhB* from this strain  
164 did not increase its sensitivity to gentamicin during iron starvation (Fig. 2, right panel)  
165 indicating that the phenotype induced by RyhB was dependent on *nuo* and *sdh*.

166 We further assessed the implication of each of the respiratory complexes by  
167 testing the sensitivity of the  $\Delta nuo$  and  $\Delta sdh$  simple mutants, deleted or not for *ryhB*  
168 (Fig. S2). The *nuo* simple mutant was almost completely resistant to gentamicin in  
169 presence of DIP, whether *ryhB* was present or not. In contrast, the *sdh* simple mutant  
170 became somewhat more sensitive (1 log) when *ryhB* was deleted from the  
171 chromosome. We conclude from these results that while both complexes are needed  
172 for full sensitivity of *ryhB* mutants to gentamicin, Nuo seems to be slightly more  
173 important than Sdh.

174

175 **RyhB represses the activity of the respiratory complexes**

176           These previous results suggested that RyhB inhibits the activity of both  
177 respiratory complexes during iron starvation. To test this, we measured Nuo and Sdh  
178 specific enzymatic activities in WT and *ryhB* mutant strains grown in presence or  
179 absence of the iron chelator DIP in the growth medium. Nuo activity was decreased  
180 when the WT strain was grown in LB medium depleted for iron (about 4-fold)  
181 (Fig. 3A). In contrast, deleting *ryhB* from the chromosome restored 75% of Nuo  
182 activity in presence of DIP. The same pattern was also observed for Sdh activity (Fig.  
183 3B). Altogether, these results confirm that RyhB represses the activities of both Nuo  
184 and Sdh complexes in medium deprived for iron.

185

### 186 **RyhB represses *nuo* and *sdh* expression**

187 RyhB inhibition of Sdh and Nuo activities may be due to the repression of the  
188 synthesis and / or of the maturation of the complexes. Expression of *sdh* has already  
189 been shown to be repressed by RyhB (20,30). In contrast, although pointed out in  
190 global approaches, RyhB regulation of *nuo* genes expression still awaited  
191 investigation (17,31–33).

192           Using the RNA-fold software (<http://unafold.rna.albany.edu>), we could predict a  
193 base-pairing in between RyhB and the 5' un-translated region of the first gene of  
194 operon, *nuoA* (34). This base-pairing involves 21 nucleotides (nt) of RyhB and  
195 includes the ribosome-binding site (RBS) and the start codon of *nuoA* (Fig. 4A).  
196 Overexpression of *ryhB* on a plasmid decreased the activity of a  $P_{BAD}$ -*nuoA-lacZ*  
197 fusion of about 4-fold, as compared to cells transformed with an empty vector  
198 (Fig. 4B). In addition, the  $P_{BAD}$ -*nuoA-lacZ* activity was decreased by 2-fold when WT

199 cells were treated with DIP. This was in sharp contrast with the isogenic *ryhB* mutant  
200 strain for which activity remained the same in presence or absence of DIP (Fig. 4C).

201 We then tested the biological relevance of the predicted base-pairing by  
202 introducing point mutations in the  $P_{BAD}$ -*nuoA-lacZ* chromosomal fusion, giving rise to  
203 the *nuoA<sub>mut</sub>-lacZ* fusion (G86C and C87G; Fig. 4A). In contrast to the WT *nuoA-lacZ*  
204 fusion, RyhB overexpression was no longer able to repress activity of the *nuoA<sub>mut</sub>*  
205 fusion (Fig. 4D). We then introduced compensatory mutations in the pRyhB plasmid  
206 that should restore base-pairing to the mutated, but not to the WT, *nuo-lacZ* fusion,  
207 giving rise to pRyhB<sub>mut</sub>. As seen in figure 4D, overexpression of RyhB<sub>mut</sub> failed to fully  
208 repress the WT *nuo-lacZ* fusion, but was able to repress *nuoA<sub>mut</sub>-lacZ* fusion.  
209 Altogether these results show that RyhB represses *nuo* expression by base-pairing  
210 on the mRNA upstream *nuoA*.

211 We then evaluated the effect of this repression on protein levels by performing  
212 Western blot analyses against NuoG, a protein of the complex. Strikingly, NuoG  
213 protein levels decreased steeply, about 3-fold, when the WT strain was grown in  
214 presence of DIP (Fig. 4E). This phenotype was suppressed in the *ryhB* mutant,  
215 confirming the *in vivo* inhibition of Nuo synthesis by RyhB.

216 As a control and to compare *sdh* regulation to *nuo*, we performed a series of  
217 similar tests on an *sdhC-lacZ* fusion. We saw that RyhB overexpression repressed  
218 the expression of the fusion by more than 10 fold (Fig. S3A). In addition, the WT  
219 fusion was also strongly inhibited when cells were grown in presence of DIP but not  
220 when *ryhB* was deleted from the chromosome (Fig. S3B). Identical conclusions were  
221 reached from analyzing SdhB protein levels by performing Western blots (Fig. S3C).  
222 These experiments thus confirm the regulation of *sdh* by RyhB in our conditions.

223

## 224 **RyhB inhibits Nuo and Sdh maturation by repressing *iscSUA***

225 Biogenesis of Fe-S clusters by the Isc machinery has been shown to be key  
226 for full Nuo and Sdh activity and their associated pmf production. The *iscSUA* mRNA  
227 is a known RyhB target (16). Therefore, we asked if reducing levels of the Isc  
228 machinery synthesis following RyhB inhibition would be sufficiently important such as  
229 it would bear consequences on maturation of Nuo and Sdh.

230 To do so, we measured Nuo and Sdh specific activities in strains deleted for  
231 *suf* or for *isc* with or without *ryhB* (Fig. 5). In agreement with the literature, Nuo  
232 activity was decreased more than 5 fold in an *isc* mutant where the Suf machinery  
233 alone is responsible for Fe-S biogenesis (Fig. 5A). Activities of the *isc* mutant  
234 remained low in iron-deprived conditions, even when RyhB-mediated repression of  
235 Nuo and Sdh respiratory complexes synthesis was alleviated by deleting *ryhB*. Nuo  
236 activity of the  $\Delta$ *suf* strain was comparable to that of the WT and DIP treatment  
237 inflicted the same drop in activity. Strikingly however, further deleting *ryhB* in the *suf*  
238 mutant almost completely restored Nuo activity when cells were grown in low iron  
239 condition. Thus, we concluded that repression of *iscSUA* and *nuo* by RyhB is  
240 sufficient to almost abolish Nuo activity. Moreover, these data strongly suggest that  
241 Isc is the only system that allows Fe-S clusters maturation of Nuo complex,  
242 regardless of the iron concentration in the medium.

243 The situation was slightly different for Sdh. Deleting *isc* severely affected  
244 activity of Sdh in presence or absence of iron. In sharp contrast to Nuo however,  
245 activity of Sdh was not restored when *ryhB* was deleted from the *suf* mutant (Fig. 5B).  
246 Further deleting *ryhB* from this strain marginally restored Sdh activity, indicating that

247 Suf can at least partially maturate Sdh proteins that are produced in absence of *ryhB*.  
248 These results thus suggest that Isc cannot ensure maturation of Sdh in low iron  
249 conditions.

250

251 **RyhB induces gentamicin resistance by repressing *isc*, *nuo* and *sdh***  
252 **expression**

253 In order to better appraise the role of Fe-S clusters maturation inhibition by  
254 RyhB in the resistance to gentamicin, we performed sensitivity assays in strains  
255 containing only one of the two Fe-S biogenesis machineries. As previously shown,  
256 the *isc* mutant was fully resistant to gentamicin in LB (Fig. 6A) (7). This phenotype  
257 remained unchanged when DIP was added to the medium, whether RyhB was  
258 present or not (Fig. 6A), thus showing that the slight Sdh activity observed in these  
259 conditions (Fig. 5) is not sufficient to render the cells sensitive to gentamicin. In sharp  
260 contrast, introducing a *ryhB* mutation restored sensitivity of a *suf* mutant strain when  
261 grown in presence of DIP (Fig. 6B), which is in agreement with the restoration of Nuo  
262 activity in this strain under these conditions.

263 As Nuo and Sdh activities are determinants for gentamicin sensitivity, we  
264 investigated if we could correlate both the levels of complexes enzymatic activity with  
265 that of resistance to gentamicin. Strikingly, there was an almost linear correlation  
266 between Nuo or Sdh activities of each strain and its sensitivity to gentamicin (Fig. S4  
267 A and B). For instance, strains displaying the lowest Nuo activities were the most  
268 resistant to gentamicin, and vice versa.

269 Taken together, the ensemble of these results show that the maturation of Nuo  
270 and Sdh by Isc is essential for pmf production and that RyhB phenotypic resistance to

271 gentamicin is due to both the direct inhibition of the expression of *nuo* and *sdh*, but

272 also indirectly to the inhibition of Nuo maturation by Isc.

273

274

## Discussion

275

276 Phenotypic resistance can take place when environmental conditions change  
277 the metabolic state of the cell. Adaptative molecular responses modify cellular  
278 physiology, which induce a transient resistance state. Here, we show that the sRNA  
279 RyhB is a major contributor of *E. coli* phenotypic resistance to gentamicin in iron  
280 limiting conditions. Aminoglycosides uptake depends upon the activity of respiratory  
281 complexes I (Nuo) and II (Sdh) that produce pmf, directly and indirectly, respectively.  
282 RyhB acts negatively on both respiratory complexes, directly at the level of their  
283 synthesis and indirectly at the level of their maturation (i.e. acquisition of Fe-S  
284 clusters) (Fig. 7). Our model strengthens the role of the pmf-producing respiratory  
285 complexes in entry of aminoglycosides. Fe-S biogenesis maturation of the complexes  
286 was earlier pointed out as the main factor for resistance (7). By identifying here that  
287 the *nuo* mRNA is targeted by RyhB in addition to *sdh*, we show that synthesis of the  
288 respiratory complexes is also key in this process.

289 As early as 2005, the *nuo* mRNA was suspected to be a target of RyhB as the  
290 operon was down-regulated when the sRNA was over-expressed, (17). The *nuo*  
291 mRNA was also more recently found associated with Hfq and RyhB in a global study  
292 of sRNA-mRNA interactions (33). We here could predict and confirm a direct base-  
293 pairing of RyhB to the *nuo* mRNA at the level of the UTR of *nuoA*, the first gene of the  
294 operon. This base-pairing occurs close to the ribosome binding site of *nuoA*, which  
295 strongly suggests that RyhB represses expression of *nuo* in a “classical” way, i.e. by  
296 occluding binding of the ribosome, leading to the degradation of the mRNA (35). The  
297 *nuo* mRNA is very long (about 15 kb) and comprises 14 genes, which makes it one of

298 the longest mRNAs regulated by a sRNA to our knowledge. Importantly, in addition to  
299 the effects seen on *nuoA* by our beta-galactosidase assays (Fig. 4), we could also  
300 observe by Western blots RyhB repression on NuoG level (Fig. 4E), whose gene lies  
301 more than 5 kb away from the base-pairing site. It will thus be interesting to  
302 investigate how far downstream repression inhibits expression of the *nuo* operon.

303 Respiratory complexes are high iron consumers, with a total of 12 Fe-S  
304 clusters for Nuo and Sdh in *E. coli*. Thus, their repression by RyhB is in line with its  
305 role in installing an iron sparing response when iron becomes scarce (17,19). Before  
306 our results, one could have imagined that RyhB represses Nuo and Sdh expression  
307 in order to limit accumulation of inactive apo-complexes in iron scarce conditions.  
308 However, both protein levels and activity of Nuo are restored in a *ryhB* mutant in iron-  
309 deprived medium indicating that maturation of respiratory complex I is possible under  
310 these conditions. These results strongly suggest that RyhB inhibits synthesis of Nuo  
311 Sdh not because they cannot be matured, but rather to preclude respiratory  
312 complexes to divert iron from other essential processes.

313 By repressing the *iscSUA* mRNA expression, RyhB also inhibits indirectly the  
314 maturation of Nuo (Fig. 3A and Fig. 5A). In contrast, maturation of Sdh was only  
315 partially restored in the *ryhB* mutant in presence of DIP (Fig. 3B) and, perhaps more  
316 surprisingly, this activity did not seem to be dependent on Isc but rather on Suf (Fig.  
317 5B). More investigation is needed to understand the molecular basis for the  
318 difference in between Isc and Suf substrates preference. In any case, our results also  
319 clearly show that Nuo activity is more important than that of Sdh in installing a  
320 phenotypic resistance to gentamicin (Fig. S2). This may relate to pmf production by  
321 Nuo and Sdh. Indeed, Nuo, but not Sdh, directly translocates 4 protons across the



322 membrane, while both indirectly contribute to pmf production by passing electrons to  
323 cytochrome oxidase (12,36).

324 The inhibition of respiratory complexes activity suggests that RyhB controls a  
325 complete metabolic shift during iron starvation, likely from respiration to fermentation.  
326 Although much needs to be done to assess this hypothesis, our recent survey  
327 indicates that a significant number of genes encoding Fe—S dependent enzyme of  
328 the TCA cycle are under the negative control of RyhB (19). Whether their maturation  
329 is also under RyhB influence via its control of the Isc system is an exciting issue to  
330 address.

331 Our study puts RyhB on the focus among a growing number of sRNAs that  
332 have been directly or indirectly linked to antibiotic resistance (36–38). However, in  
333 most of these cases phenotypes were derived from overexpression of the sRNAs and  
334 not relevant to physiological conditions. For instance, 17 out of 26 *E. coli* sRNAs that  
335 were assessed in a systematic manner against a variety of antibacterial effectors  
336 were shown to affect sensitivity to antibiotics when overexpressed, but few showed  
337 any phenotype when mutated (39).

338 A most spectacular case is represented by the role RyhB could play in the  
339 bacterial persistence of uropathogenic *E. coli* to different classes of antibiotics,  
340 among which included gentamicin (40). Persistence is a phenomenon in which a  
341 fraction of the bacterial population enters a metabolically inactive state that enables it  
342 to survive exposure to bactericidal antibiotics (41). Interestingly, in this study it was  
343 proposed that *ryhB* mutants would induce less persister cells because they display  
344 increased ATP levels and altered NAD<sup>+</sup> / NADH ratios. In the light of our results, we  
345 believe these effects are explained by the fact that *ryhB* mutants probably display

346 higher levels of Nuo, Sdh and Isc and therefore are more metabolically active, but  
347 also more prone to uptake the antibiotic. It is noteworthy that these experiments were  
348 conducted in rich medium not devoid for iron, and after long treatment with antibiotics  
349 (four days), which may explain low induction of RyhB in only a small percentage of  
350 bacterial cells that would then be able to resist antibiotics treatment in a persister-like  
351 manner.

352 RyhB homologs and paralogs are found in multiple other bacterial species,  
353 which suggests that many bacteria outside of *E. coli* may share the resistance  
354 mechanism that we describe here (19,42–44). In particular, other pathogenic bacteria  
355 such as *Yersinia*, *Shigella* or *Salmonella* possess not only RyhB homologs, but also  
356 the Isc and Suf system and rely on Nuo and Sdh for respiration on oxygen (45,46).  
357 RyhB has also been implicated in promoting sensitivity to colicin IA, which is not an  
358 antibiotic in a narrow sense, but a bacteriocin secreted by other species to  
359 outcompete bacteria sharing the same niches (47). In addition, RyhB has been  
360 shown to be involved in the virulence of *Shigella dysenteriae* by repressing the major  
361 virulence regulator *virB*, and the sRNA may be associated with the virulence of  
362 *Yersinia pestis*, as the expression of its two RyhB homologs (RyhB1 and RyhB2)  
363 increases in the lung of infected mice (43,48). Altogether, these data point out for a  
364 major role for RyhB in escaping antibacterial action.

365

## Materials and methods

366

### 367 **Strains and culture**

368 All strains used in this study are derivatives of *E. coli* MG1655 and are listed in  
369 Table S1. Strains were grown in LB broth (Difco), containing various concentrations  
370 of 2,2'-dipyridyl (DIP) (Sigma) when stated. Transductions with P1 phage were used  
371 for moving marked mutation as described previously in (49). The plac and pRyhB  
372 plasmids used in this study are described and have been transformed as previously  
373 described in (50). All oligonucleotides used are listed in Table S2.

374

### 375 **Antibiotic sensitivity experiments**

376 Starting from overnight cultures in LB, strains were diluted 1/100 time in fresh  
377 medium containing or not DIP and grown aerobically at 37 °C with shaking until  
378  $OD_{600} \approx 0.2$ . At this point, antibiotics were added to the cells (gentamicin: 5 µg / mL;  
379 ampicillin: 5 µg / mL; tetracycline: 5 µg / mL and norfloxacin: 25 ng / mL). After 3 h  
380 cells were taken, diluted in PBS buffer and spotted on LB agar plates and incubated  
381 at 37 °C for 16 h. Cell survival was determined by counting the number of colony-  
382 forming units per mL (c.f.u. / mL). The absolute c.f.u at time-point 0 was  
383 of  $\approx 5 \times 10^7$  cells / mL in all experiments.

384

### 385 **Minimum inhibitory concentration (MIC) determination**

386 The MIC were determined as previously described (51). Briefly, each antibiotic  
387 containing-well of a 96-well micro-titer plate was inoculated with 100 µL of a fresh LB  
388 bacterial inoculum of  $2 \times 10^5$  c.f.u / mL. The plate was incubated at 37°C for 18 h

389 under aerobic conditions. OD<sub>600</sub> for each well was then determined by measuring the  
390 absorbance on a Tecan infinite 200. MIC was defined as the lowest drug  
391 concentration that exhibited complete inhibition of microbial growth.

392

393

### 394 **Fusions construction**

395 The  $P_{BAD}$ -*nuoA-lacZ* and  $P_{BAD}$ -*sdhC-lacZ* fusions were constructed and  
396 recombined in PM1205 strain, as previously described (25). Briefly, sequences  
397 corresponding to *nuo* or *sdh* genes starting from its +1 transcriptional start up to 30  
398 nucleotides downstream of the ATG codon were amplified using oligonucleotides  
399  $P_{BAD}$ -*nuoA-F* or  $P_{BAD}$ -*sdhC-F*, and *lacZ-nuoA-R* or *lacZ-sdhC-R*, respectively. PCR  
400 amplifications were carried out using the EconoTaq DNA polymerase from Lucigen.  
401 The purified PCR products were then electroporated into strain PM1205 for  
402 recombination at the *lacZ* site. Recombinants carrying the desired fusions (SC005  
403 and SC009) were selected on LB plates devoid of NaCl and containing 5 % sucrose,  
404 0,2 % arabinose and 40 µg / mL X-Gal (5-bromo-4-chloro-3-indolyl-D-  
405 galactopyranoside). Blue colonies were chosen, and the resulting fusions were  
406 sequenced using oligonucleotides *lacI-F* and *Deep-lac*.

407 Overlap PCR was used to introduce point mutation in the fusion. The two PCR  
408 products corresponding to the sequence upstream and downstream of the desired  
409 mutation were amplified by PCR with oligonucleotides *nuoAmut-F* and *Deep-lac*, and  
410 *LacI-F* and *nuoAmut-R* containing the desired mutation and using genomic DNA from  
411 the SC005 strain as a template. The two PCR products were then joined by an

412 overlap PCR using oligonucleotides lacI-F and Deep-lac. The resulting PCR products  
413 were purified, electroporated in strain PM1205 and sequenced as described above.

414 For point mutations in the pRyhB plasmid, the pRyhB plasmid was first purified  
415 from a WT (*dam*<sup>+</sup>) *E. coli* strain, and then amplified by PCR with oligonucleotides  
416 RyhBmut-F and RyhBmut-R, containing the desired mutation. The native plasmid was  
417 eliminated from the resulting PCR product by Dpn1 enzyme digestion for 1 h at 37 °C.  
418 Plasmids containing the desired mutation were then purified and transformed in  
419 SC005 and SC0026 strains.

420

### 421 **β-galactosidase experiments**

422 Overnight cultures of different strains were diluted 1/100 times in fresh medium  
423 in culture flasks containing ampicillin and IPTG (isopropyl β-D-  
424 1thiogalactopyranoside) or DIP when indicated. After ≈ 7 hours of growth 100 μL of  
425 cultures were dispatched in 96 wells microtiter plates (triplicates for each conditions).  
426 Absorbance at 600 nm was measured in a microtiter plate reader (Tecan infinite 200  
427 ®). Then, 50 μL of permeabilization buffer were added in each well (100 mM Tris HCl  
428 pH 7,8; 32 mM Na<sub>2</sub>HPO<sub>4</sub>; 8 mM EDTA; 40 mM Triton; H<sub>2</sub>O milli Q) and the microtiter  
429 plate was incubated for 10 minutes at room temperature. O-Nitrophenyl-β-D-  
430 galactopyranoside (ONPG) was added to the solution and appearance of its  
431 degradation product was immediately determined by measuring the absorbance at  
432 420 nm on a Tecan infinite 200 during 30 minutes. The specific activities were  
433 calculated by measuring the Vmax of the OD<sub>420</sub> appearance divided by the OD<sub>600</sub>.  
434 Values were then multiplied by 100000, a coefficient that was chosen empirically to  
435 approximate Miller units.

436

### 437 **Nuo and Sdh enzymatic activities**

438 The Nuo and Sdh enzymatic activities were determined as previously described  
439 (52,53). Briefly, overnight cultures of the strains of interest were diluted 1/100 times in  
440 fresh LB medium containing or not 250  $\mu$ M of DIP and grown at 37 °C with shaking  
441 until they reached  $OD_{600} \approx 0.6$ . Cultures were pelleted by centrifugation (11 000 G,  
442 10 min at 4 °C) and washed in phosphate buffer (50 mM pH 7,5). Cells were then  
443 lysed at the French press and 100  $\mu$ L were immediately frozen in liquid nitrogen  
444 before determining Nuo activity. Nuo enzymatic activity was determined at 30 °C by  
445 monitoring the disappearance of the specific Deamino-NADH (DNADH) substrate at  
446 340 nm every 5 s during 10 min at 30 °C in a spectrophotometer.

447 For Sdh activity determination, lysate samples from French press were pellet  
448 by centrifugation (11 000 G, 10 min at 4 °C) and the supernatant was used for  
449 membrane fraction preparation by ultracentrifugation at 45 000 G at 4 °C during two  
450 hours. Pellets were then resuspended in phosphate buffer and kept in liquid nitrogen  
451 for later Sdh activity measurements. The enzyme was first activated by incubation in  
452 50 mM Tris-HCl (pH 7.5), 4 mM succinate, 1 mM KCN for 30 min at 30 °C. The  
453 enzymatic activity was measured in the membrane fraction by monitoring Phenazine  
454 EthoSulfate (PES)-coupled reduction of dichlorophenol indophenol (DCPIP) at  
455 600 nm, in a reaction containing 50 mM Tris-HCl (pH 7.5), 4 mM succinate, 1  
456 mM KCN, 400  $\mu$ M PES and 50  $\mu$ M DCPIP.

457 The specific activities were calculated by measuring the  $V_{max}$  divided by the  
458 protein concentration in total extracts evaluated by absorbance at 280 nm.

459

460 **Quantification of Nuo and Sdh protein levels by Western blot analyses**

461 Total extracts and membranes preparation prepared for Nuo and Sdh activities were  
462 used for quantification of Nuo and Sdh protein levels, respectively. Total protein  
463 levels were determined by measuring absorbance at 280 nm on a  
464 spectrophotometer. Same amount of total protein level were migrated on poly-  
465 acrylamide gels Tris-gly Sodium Dodecyl Sulfate (Novex 4-20 % Tris-Glycine Mini  
466 Gels) then, transferred on nitrocellulose membrane using Pierce G2 Fast Blotter  
467 (25 V, 1,3 mA, 7 min). Protein level were detected by incubating the membrane with  
468  $\alpha$ -NuoG or  $\alpha$ -SdhB (1/1000) antibodies from rabbit and then by an  $\alpha$ -rabbit antibody  
469 (1/1000) coupled with Hrp peroxidase. Signals were detected by chemiluminescence  
470 with Pierce ECL Western blotting system on an ImageQuant LAS 4000 camera.  
471 Quantification of protein levels was determined by measuring the specific signal  
472 intensity of the bands corresponding to Nuo and Sdh proteins with the ImageJ  
473 software. Intensities were normalized using an unspecific band detected by the same  
474 antibody.

475

## Acknowledgements

476

477 We would like to thank A. Battesti for precious help with strain constructions and A.  
478 Huguenot for critical guidance with enzymatic activities assays. P.M., F.B. and S.C.  
479 work was funded by the Centre National de la Recherche Scientifique (CNRS) and  
480 Aix Marseille Université (AMU). S.C. is a recipient of a Fondation pour la Recherche  
481 Médicale grant (FDT20170436820).



482

## References

- 483 1. Woolhouse M, Waugh C, Perry MR, Nair H. Global disease burden due to antibiotic  
484 resistance - state of the evidence. *J Glob Health*. 2016 Jun;6(1):010306.
- 485 2. Laxminarayan R, Matsoso P, Pant S, Brower C, Røttingen J-A, Klugman K, et al. Access  
486 to effective antimicrobials: a worldwide challenge. *Lancet Lond Engl*. 2016 Jan  
487 9;387(10014):168–75.
- 488 3. van Hoek AHAM, Mevius D, Guerra B, Mullany P, Roberts AP, Aarts HJM. Acquired  
489 Antibiotic Resistance Genes: An Overview. *Front Microbiol* [Internet]. 2011 Sep 28;2.  
490 Available from: <https://www.ncbi.nlm.nih.gov/pmc/articles/PMC3202223/>
- 491 4. Munita JM, Arias CA. Mechanisms of Antibiotic Resistance. *Microbiol Spectr*  
492 [Internet]. 2016 Apr;4(2). Available from:  
493 <https://www.ncbi.nlm.nih.gov/pmc/articles/PMC4888801/>
- 494 5. Corona F, Martinez JL. Phenotypic Resistance to Antibiotics. *Antibiotics*. 2013 Apr  
495 18;2(2):237–55.
- 496 6. Poole K. Bacterial stress responses as determinants of antimicrobial resistance. *J*  
497 *Antimicrob Chemother*. 2012 Sep;67(9):2069–89.
- 498 7. Ezraty B, Vergnes A, Banzhaf M, Duverger Y, Huguenot A, Brochado AR, et al. Fe-S  
499 cluster biosynthesis controls uptake of aminoglycosides in a ROS-less death pathway.  
500 *Science*. 2013 Jun 28;340(6140):1583–7.
- 501 8. Fontecave M. Iron-sulfur clusters: ever-expanding roles. *Nat Chem Biol*. 2006  
502 Apr;2(4):171–4.

- 503 9. Kiley PJ, Beinert H. The role of Fe-S proteins in sensing and regulation in bacteria. *Curr*  
504 *Opin Microbiol.* 2003 Apr;6(2):181–5.
- 505 10. Roche B, Aussel L, Ezraty B, Mandin P, Py B, Barras F. Iron/sulfur proteins biogenesis  
506 in prokaryotes: formation, regulation and diversity. *Biochim Biophys Acta.* 2013  
507 Mar;1827(3):455–69.
- 508 11. Lill R. Function and biogenesis of iron-sulphur proteins. *Nature.* 2009 Aug  
509 13;460(7257):831–8.
- 510 12. Simon J, van Spanning RJM, Richardson DJ. The organisation of proton motive and  
511 non-proton motive redox loops in prokaryotic respiratory systems. *Biochim Biophys Acta.*  
512 2008 Dec;1777(12):1480–90.
- 513 13. Friedrich T, Dekovic DK, Burschel S. Assembly of the Escherichia coli  
514 NADH:ubiquinone oxidoreductase (respiratory complex I). *Biochim Biophys Acta.* 2016  
515 Mar;1857(3):214–23.
- 516 14. Lancaster CRD. Succinate:quinone oxidoreductases: an overview. *Biochim Biophys*  
517 *Acta.* 2002 Jan 17;1553(1–2):1–6.
- 518 15. Davis BD. Mechanism of bactericidal action of aminoglycosides. *Microbiol Rev.* 1987  
519 Sep;51(3):341–50.
- 520 16. Desnoyers G, Morissette A, Prévost K, Massé E. Small RNA-induced differential  
521 degradation of the polycistronic mRNA iscRSUA. *EMBO J.* 2009 Jun 3;28(11):1551–61.
- 522 17. Massé E, Vanderpool CK, Gottesman S. Effect of RyhB small RNA on global iron use in  
523 Escherichia coli. *J Bacteriol.* 2005 Oct;187(20):6962–71.

- 524 18. Massé E, Salvail H, Desnoyers G, Arguin M. Small RNAs controlling iron metabolism.  
525 *Curr Opin Microbiol.* 2007 Apr;10(2):140–5.
- 526 19. Chareyre S, Mandin P. Bacterial Iron Homeostasis Regulation by sRNAs. *Microbiol*  
527 *Spectr.* 2018 Mar;6(2).
- 528 20. Massé E, Gottesman S. A small RNA regulates the expression of genes involved in iron  
529 metabolism in *Escherichia coli*. *Proc Natl Acad Sci U S A.* 2002 Apr 2;99(7):4620–5.
- 530 21. Seo SW, Kim D, Latif H, O’Brien EJ, Szubin R, Palsson BO. Deciphering Fur  
531 transcriptional regulatory network highlights its complex role beyond iron metabolism in  
532 *Escherichia coli*. *Nat Commun.* 2014 Sep 15;5:4910.
- 533 22. Giel JL, Nesbit AD, Mettert EL, Fleischhacker AS, Wanta BT, Kiley PJ. Regulation of  
534 iron-sulphur cluster homeostasis through transcriptional control of the Isc pathway by [2Fe-  
535 2S]-IscR in *Escherichia coli*. *Mol Microbiol.* 2013 Feb;87(3):478–92.
- 536 23. Mettert EL, Kiley PJ. Coordinate Regulation of the Suf and Isc Fe-S Cluster Biogenesis  
537 Pathways by IscR Is Essential for Viability of *Escherichia coli*. *J Bacteriol.* 2014 Dec  
538 15;196(24):4315–23.
- 539 24. Ezraty B, Barras F. The “liaisons dangereuses” between iron and antibiotics. *FEMS*  
540 *Microbiol Rev.* 2016;40(3):418–35.
- 541 25. Mandin P, Chareyre S, Barras F. A Regulatory Circuit Composed of a Transcription  
542 Factor, IscR, and a Regulatory RNA, RyhB, Controls Fe-S Cluster Delivery. *mBio.* 2016 20;7(5).
- 543 26. Massé E, Escorcia FE, Gottesman S. Coupled degradation of a small regulatory RNA  
544 and its mRNA targets in *Escherichia coli*. *Genes Dev.* 2003 Oct 1;17(19):2374–83.

- 545 27. Kohanski MA, Dwyer DJ, Hayete B, Lawrence CA, Collins JJ. A common mechanism of  
546 cellular death induced by bactericidal antibiotics. *Cell*. 2007 Sep 7;130(5):797–810.
- 547 28. Dwyer DJ, Kohanski MA, Collins JJ. Role of reactive oxygen species in antibiotic action  
548 and resistance. *Curr Opin Microbiol*. 2009 Oct;12(5):482–9.
- 549 29. Unden G, Steinmetz PA, Degreif-Dünnwald P. The Aerobic and Anaerobic Respiratory  
550 Chain of *Escherichia coli* and *Salmonella enterica*: Enzymes and Energetics. *EcoSal Plus*. 2014  
551 May;6(1).
- 552 30. Desnoyers G, Massé E. Noncanonical repression of translation initiation through small  
553 RNA recruitment of the RNA chaperone Hfq. *Genes Dev*. 2012 Apr 1;26(7):726–39.
- 554 31. Beauchene NA, Myers KS, Chung D, Park DM, Weisnicht AM, Keleş S, et al. Impact of  
555 Anaerobiosis on Expression of the Iron-Responsive Fur and RyhB Regulons. *mBio*. 2015 Dec  
556 15;6(6):e01947-01915.
- 557 32. Wang J, Rennie W, Liu C, Carmack CS, Prévost K, Caron M-P, et al. Identification of  
558 bacterial sRNA regulatory targets using ribosome profiling. *Nucleic Acids Res*. 2015 Dec  
559 2;43(21):10308–20.
- 560 33. Melamed S, Peer A, Faigenbaum-Romm R, Gatt YE, Reiss N, Bar A, et al. Global  
561 Mapping of Small RNA-Target Interactions in Bacteria. *Mol Cell*. 2016 01;63(5):884–97.
- 562 34. Markham NR, Zuker M. UNAFold: software for nucleic acid folding and hybridization.  
563 *Methods Mol Biol Clifton NJ*. 2008;453:3–31.
- 564 35. De Lay N, Schu DJ, Gottesman S. Bacterial small RNA-based negative regulation: Hfq  
565 and its accomplices. *J Biol Chem*. 2013 Mar 22;288(12):7996–8003.

- 566 36. Lalaouna D, Eyraud A, Chabelskaya S, Felden B, Massé E. Regulatory RNAs Involved in  
567 Bacterial Antibiotic Resistance. *PLOS Pathog.* 2014 Aug 28;10(8):e1004299.
- 568 37. Dersch P, Khan MA, Mühlen S, Görke B. Roles of Regulatory RNAs for Antibiotic  
569 Resistance in Bacteria and Their Potential Value as Novel Drug Targets. *Front Microbiol.*  
570 2017;8:803.
- 571 38. Felden B, Cattoir V. Bacterial Adaptation to Antibiotics through Regulatory RNAs.  
572 *Antimicrob Agents Chemother.* 2018 May;62(5).
- 573 39. Kim T, Bak G, Lee J, Kim K-S. Systematic analysis of the role of bacterial Hfq-  
574 interacting sRNAs in the response to antibiotics. *J Antimicrob Chemother.* 2015;70(6):1659–  
575 68.
- 576 40. Zhang S, Liu S, Wu N, Yuan Y, Zhang W, Zhang Y. Small Non-coding RNA RyhB  
577 Mediates Persistence to Multiple Antibiotics and Stresses in Uropathogenic *Escherichia coli*  
578 by Reducing Cellular Metabolism. *Front Microbiol [Internet].* 2018 Feb 6;9. Available from:  
579 <https://www.ncbi.nlm.nih.gov/pmc/articles/PMC5808207/>
- 580 41. Lewis K. Persister cells: molecular mechanisms related to antibiotic tolerance. *Handb*  
581 *Exp Pharmacol.* 2012;(211):121–33.
- 582 42. Murphy ER, Payne SM. RyhB, an iron-responsive small RNA molecule, regulates  
583 *Shigella dysenteriae* virulence. *Infect Immun.* 2007 Jul;75(7):3470–7.
- 584 43. Deng Z, Meng X, Su S, Liu Z, Ji X, Zhang Y, et al. Two sRNA RyhB homologs from  
585 *Yersinia pestis* biovar *microtus* expressed in vivo have differential Hfq-dependent stability.  
586 *Res Microbiol.* 2012 Jul;163(6–7):413–8.

- 587 44. Kim JN, Kwon YM. Genetic and phenotypic characterization of the RyhB regulon in  
588 *Salmonella Typhimurium*. *Microbiol Res*. 2013 Jan 15;168(1):41–9.
- 589 45. Unden G, Dünwald P. The Aerobic and Anaerobic Respiratory Chain of *Escherichia*  
590 *coli* and *Salmonella enterica*: Enzymes and Energetics. *EcoSal Plus*. 2008 Sep;3(1).
- 591 46. Parkhill J, Wren BW, Thomson NR, Titball RW, Holden MT, Prentice MB, et al.  
592 Genome sequence of *Yersinia pestis*, the causative agent of plague. *Nature*. 2001 Oct  
593 4;413(6855):523–7.
- 594 47. Salvail H, Caron M-P, Bélanger J, Massé E. Antagonistic functions between the RNA  
595 chaperone Hfq and an sRNA regulate sensitivity to the antibiotic colicin. *EMBO J*. 2013 Oct  
596 16;32(20):2764–78.
- 597 48. Broach WH, Egan N, Wing HJ, Payne SM, Murphy ER. VirF-independent regulation of  
598 *Shigella virB* transcription is mediated by the small RNA RyhB. *PLoS One*. 2012;7(6):e38592.
- 599 49. C. Manson J. *Experiments with Gene Fusions*. Edited by T. J. Silhavy, M. L. Berman and  
600 L. W. Enquist. Published by Cold Spring Harbor Laboratory, Fulfillment Department, P.O. Box  
601 100, Cold Spring Harbor, New York 11724, U.S.A. 1984. 350 pages. Paperback \$40 (\$48  
602 outside U.S.). ISBN 0 87969 163 8. *Genet Res - GENET RES*. 1985 Apr 1;45.
- 603 50. Mandin P. Genetic screens to identify bacterial sRNA regulators. *Methods Mol Biol*  
604 Clifton NJ. 2012;905:41–60.
- 605 51. Herisse M, Duverger Y, Martin-Verstraete I, Barras F, Ezraty B. Silver potentiates  
606 aminoglycoside toxicity by enhancing their uptake. *Mol Microbiol*. 2017;105(1):115–26.
- 607 52. Seaver LC, Imlay JA. Are respiratory enzymes the primary sources of intracellular

608 hydrogen peroxide? J Biol Chem. 2004 Nov 19;279(47):48742–50.

609 53. Calhoun MW, Gennis RB. Demonstration of separate genetic loci encoding distinct

610 membrane-bound respiratory NADH dehydrogenases in *Escherichia coli*. J Bacteriol. 1993

611 May;175(10):3013–9.

612

613

## Figure Legends

614

615 **Figure 1. RyhB is involved in gentamicin resistance during iron starvation.** A to  
616 D: strains were grown in LB (left panels) or in LB with DIP (250  $\mu$ M) (right panels) for  
617 3 h with or without the following antibiotics A: ampicillin (5  $\mu$ g/mL); B: norfloxacin (25  
618 ng / mL); C: tetracycline (5  $\mu$ g/mL) and D: gentamicin (5  $\mu$ g/mL). Colony forming units  
619 were counted to determine the number of surviving bacteria. Points were normalized  
620 relatively to t0 and plotted as  $\log_{10}$  of surviving bacteria. The absolute c.f.u. at time-  
621 point zero was  $\approx 5 \cdot 10^7$  c.f.u. / mL for each sample. Error bars represent the standard  
622 deviations of three independent experiments. Statistical analysis were performed with  
623 Student's T-test: \*p < 0.05; \*\*p < 0.01; \*\*\*p < 0.001. E: WT (squares) and *ryhB* mutant  
624 (circles) strains were grown in LB (regular lines) or LB depleted for iron (dashed lines)  
625 with (red curves) or without (black curves) gentamicin. The number of c.f.u. was  
626 determined at different times. Error bars represent the standard deviations of three  
627 independent experiments. Statistical analysis were performed with Student's T—test:  
628 \*p < 0,05; N.S.: Not significant.

629

630 **Figure 2. RyhB induced gentamicin resistance is dependent on Nuo and Sdh.**

631 The  $\Delta nuo \Delta sdh$  (BEFB20) and  $\Delta nuo \Delta sdh \Delta ryhB$  (SC024) strains were grown for 3 h  
632 with or without gentamicin (5  $\mu$ g / mL) in LB (left panels) or in LB with DIP 250  $\mu$ M  
633 (right panels). Colony forming units were counted to determine the number of  
634 surviving bacteria. Points were normalized relatively to t0 and plotted as  $\log_{10}$  of  
635 surviving bacteria. The absolute c.f.u. at time-point zero was  $\approx 5 \cdot 10^7$  c.f.u. / mL for  
636 each sample. Error bars represent the standard deviations of three independent



637 experiments. Statistical analysis were performed with Student's T-test: \* $p < 0,05$ ;  
638 \*\* $p < 0,01$ .

639

640 **Figure 3. RyhB decreases Nuo and Sdh enzymatic activities.** A: NADH specific  
641 enzymatic activity of Nuo in WT or  $\Delta ryhB$  strain grown in LB (dark grey bars) or in LB  
642 containing DIP (light grey bars) were determined by following the disappearance of  
643 the D-NADH substrate by spectrophotometry (nmol / min / mg protein). B: Succinate  
644 dehydrogenase activities in WT or  $\Delta ryhB$  strains grown in LB (dark grey bars) or in LB  
645 containing DIP (light grey bars) were determined by following the absorbance of  
646 DCPIP (nmol / min / mg protein). Bars represent the mean of at least three  
647 experiments and error bars represent the standard deviations. Statistical analysis  
648 were performed with Student's T-test: \* $p < 0,05$ ; \*\* $p < 0,01$ ; \*\*\* $p < 0,001$ .

649

650 **Figure 4. RyhB represses *nuo* expression.** A: base-pairing predicted between  
651 RyhB and *nuo* mRNA. Nucleotides belonging to *ryhB* are represented on top, those  
652 corresponding to *nuo* on the bottom. Relative position to the transcriptional start site  
653 of *ryhB* and *nuo* are indicated above and below the sequences, respectively. B: the  
654 SC005 strain containing a  $P_{BAD}$ -*nuoA-lacZ* fusion was transformed with the empty the  
655 plac vector or with the pRyhB plasmid containing *ryhB* under the control of an IPTG  
656 inducible promoter. Cells were grown in LB containing ampicillin (25  $\mu\text{g}/\text{mL}$ ), IPTG  
657 (100  $\mu\text{M}$ ) and arabinose (0,02 %) during 6 h after which  $\beta$ -galactosidase activity was  
658 determined. Specific activities are represented by arbitrary units that were empirically  
659 determined to be approximately equivalent to Miller units. Error bars represent the  
660 standard deviations of six independent experiments. C: strains containing the  $P_{BAD}$ -

661 *nuoA-lacZ* fusion, WT (SC005) or deleted for *ryhB* (SC006) were grown in LB with or  
662 without DIP (200  $\mu$ M) during 6h before  $\beta$ -galactosidase activities were measured.  
663 Each bar represents the mean from six independent experiments; error bars  
664 represent the standard deviations. D: Strains containing either the  $P_{BAD}$ -*nuoA-lacZ* or  
665 the  $P_{BAD}$ -*nuoA<sub>mut</sub>-lacZ* fusions were transformed with the plac, pRyhB or pRyhBmut  
666 plasmids and  $\beta$ -galactosidase activity were determined. Each point represents the  
667 mean from six or more experiments. E: WT and *ryhB* mutant cell extracts from  
668 cultures grown in LB or in LB with DIP (250  $\mu$ M) were subjected to immunoblot  
669 analyses using antibodies raised against NuoG. Quantification represents the mean  
670 of three different experiments.

671

672 **Figure 5. RyhB inhibits Nuo enzymatic activity by repressing *isc*.** Nuo (A) and  
673 Sdh (B) specific enzymatic activities of  $\Delta$ *isc* and  $\Delta$ *suf* mutants containing or not *ryhB*  
674 grown in LB (dark grey bars) or in LB containing DIP (light grey bars) were  
675 determined. Bars represent the mean of 3 independent experiments and error bars  
676 represent the standard deviations. Statistical analysis were performed with Student's  
677 T-test: \*p < 0,05 ; \*\*p < 0,01; \*\*\*p < 0,001; N.S.: Not significant.

678

679 **Figure 6. RyhB induces gentamicin resistance by inhibiting Fe-S clusters**  
680 **maturation.** The  $\Delta$ *isc* (A) and the  $\Delta$ *suf* (B) strains containing or not *ryhB* were grown  
681 with (light grey bar) or without (dark grey bars) gentamicin (5  $\mu$ g/mL) for 3 h in LB (left  
682 panels) or in LB with DIP (250  $\mu$ M) (right panels). After that, cells were diluted in PBS  
683 and spotted on LB agar plates. c.f.u. and Log<sub>10</sub> of surviving bacteria numbers were

684 determined. Error bars represent the standard deviation of three independent  
685 experiments. Statistical analysis were performed with Student's T-test: \* $p < 0,05$  ;  
686 \*\*\* $p < 0,001$ ; N.S. : Not significant.

687

688 **Figure 7. Model for the RyhB induced resistance to gentamicin during iron**  
689 **starvation.** When iron is not limiting (left panel), the Isc Fe-S biogenesis machinery  
690 ensures the maturation of Nuo and Sdh, which generate a pmf that allows gentamicin  
691 uptake. Gentamicin reaches the ribosome and incudes mistranslation, which renders  
692 cells sensitive to the antibiotics. When iron is scarce (right panel), RyhB is expressed  
693 and represses the expression of *nuo*, *sdh* and *isc*. The pmf is lowered and gentamicin  
694 cannot enter the cytoplasm thus making cells resistant to the antibiotic.

695

696 **Figure S1. RyhB increases the resistance to gentamicin during iron starvation.**

697 The WT and the  $\Delta ryhB$  mutant MIC were determined by growing cells in medium  
698 containing various concentrations of gentamicin and the iron chelator DIP (250  $\mu$ M).  
699 The MIC was defined as the lowest drug concentration that exhibited complete  
700 inhibition of microbial growth

701

702 **Figure S2. Sensitivity of *nuo* and *sdh* simple mutants to gentamicin.**  $\Delta nuo$

703 (BEFB05),  $\Delta nuo \Delta ryhB$  (SC085),  $\Delta sdh$  (BEFB06) and  $\Delta sdh \Delta ryhB$  (SC086) strains  
704 were grown with or without gentamicin (5  $\mu$ g / mL) for 3 h in LB with DIP 200  $\mu$ M.  
705 Colony forming units were counted to determine the number of surviving bacteria.  
706 Points were normalized relatively to t0 and plotted as  $\log_{10}$  of surviving bacteria. The  
707 absolute c.f.u. at time-point zero was  $\approx 5 \cdot 10^7$  c.f.u. / mL for each sample. Error bars  
708 represent the standard deviation of three independent experiments. Statistical  
709 analysis were performed with Student's T-test: \*p < 0,05 ; \*\*p < 0,01 ; N.S. : Not  
710 significant

711

712 **Figure S3. RyhB represses *sdh* expression.** A: strain containing a  $P_{BAD}$ -*sdhC-lacZ*

713 fusion (SC009) was transformed with the empty plac vector or with pRyhB plasmid  
714 containing *ryhB* under the control of an IPTG inducible promoter. Cells were grown in  
715 LB containing ampicillin (25  $\mu$ g/mL), IPTG (100  $\mu$ M) and arabinose (0,02 %) during  
716 6 h after which  $\beta$ -galactosidase activity was determined. Specific activities are  
717 represented by arbitrary units that were empirically determined to approximate Miller  
718 units. Error bars represent the standard deviations of six independent experiments. B:  
719 strains containing  $P_{BAD}$ -*sdhC-lacZ* WT (SC009) or deleted for *ryhB* (SC010) were

720 grown in LB with or without DIP (200  $\mu$ M) during 6h before  $\beta$ -galactosidase activities  
721 were measured. Each bar represents the mean from six independent experiments. C:  
722 WT and *ryhB* mutant cell extracts from cultures grown in LB or in LB with  
723 DIP (250  $\mu$ M) were subjected to Western blot analyses using antibodies raised  
724 against SdhB. Quantification represents the mean of three different experiments.  
725

726 **Figure S4. Gentamicin sensitivity can be directly correlated with Nuo and Sdh**  
727 **specific activities.** Sensitivity to gentamicin of WT,  $\Delta$ *ryhB*,  $\Delta$ *isc*,  $\Delta$ *isc*  $\Delta$ *ryhB*,  $\Delta$ *suf*  
728 and  $\Delta$ *suf*  $\Delta$ *ryhB* strains grown in LB (black points) or in LB containing DIP (red points)  
729 were plotted relatively to their Nuo (A) or Sdh (B) enzymatic activity respectively. The  
730 mean line represents linear correlation between the gentamicin sensitivity and  
731 complexes activities A :  $R^2 = 0,86593$  ; B :  $R^2 = 0,77648$  . Error bars represent the  
732 standard deviation of three independent experiments.

733

734

735 **Table S1. Strains and plasmids used in this study.**

736

737 **Table S2. Oligonucleotides used in this study.**

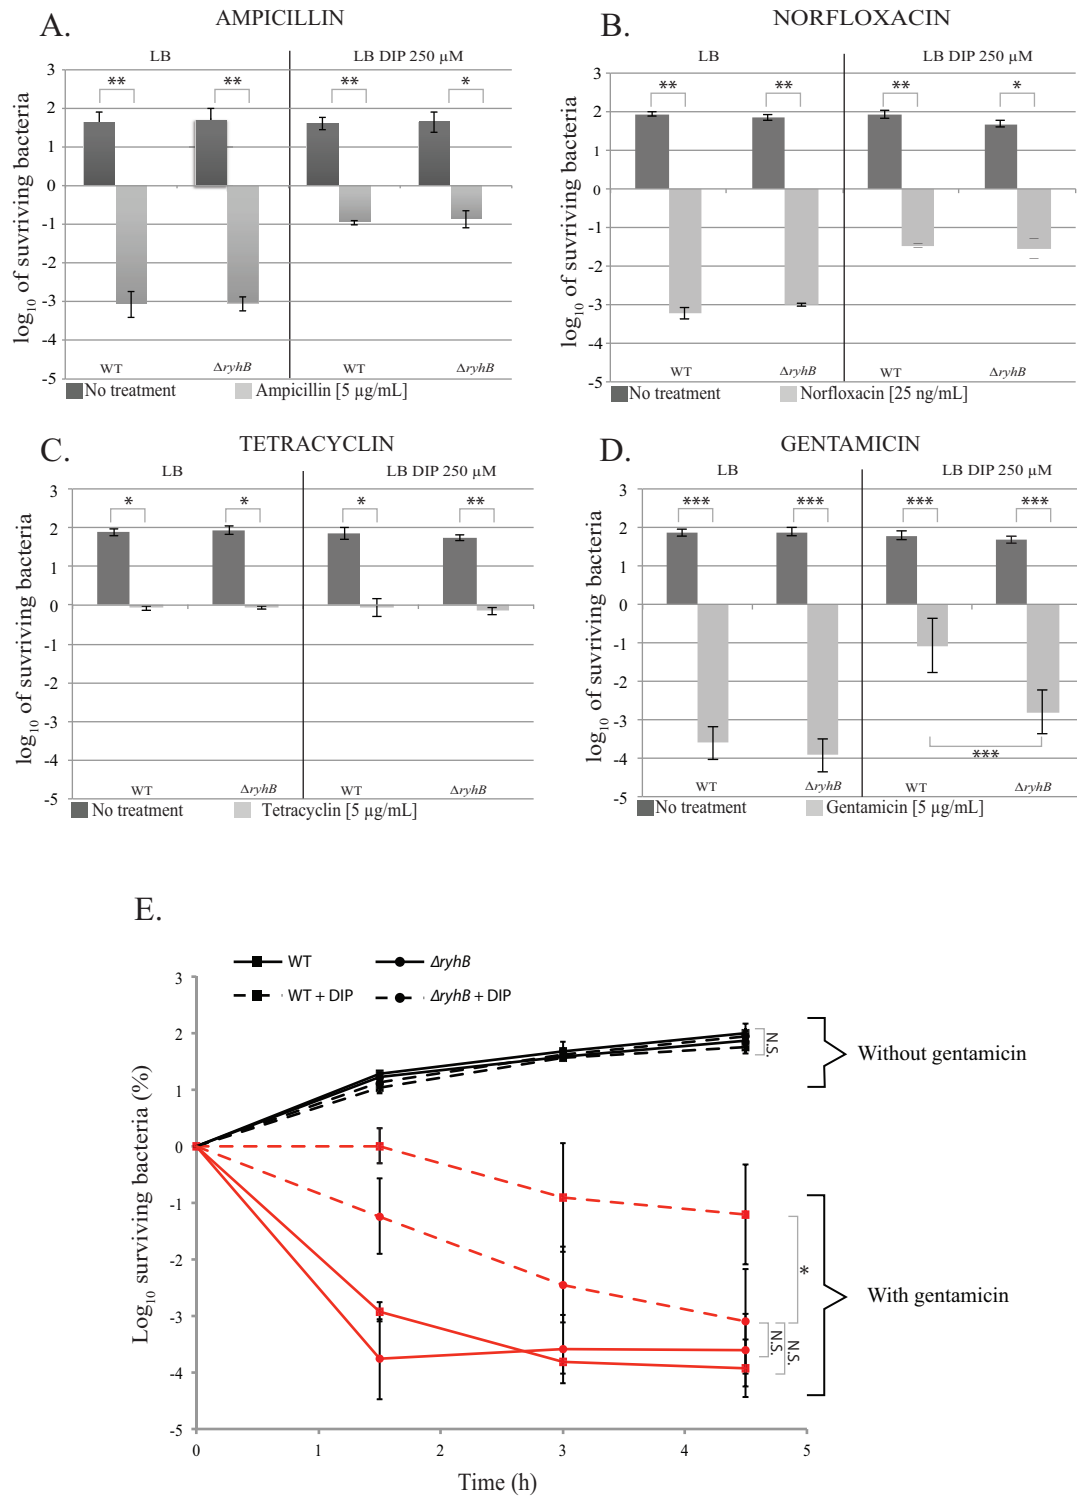

Figure 1.

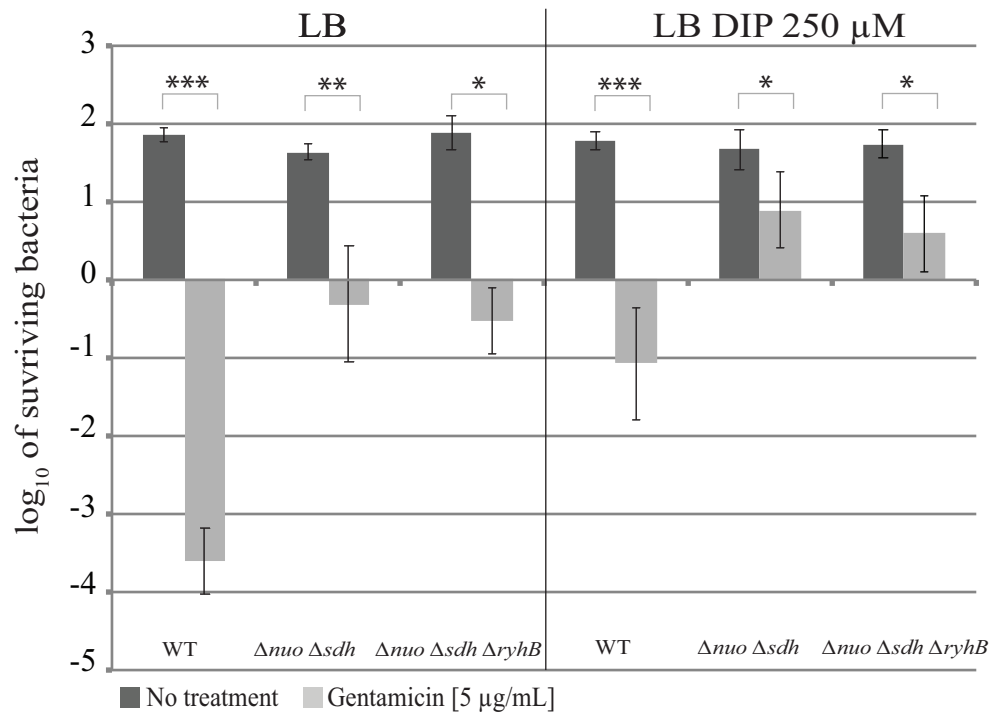

Figure 2.

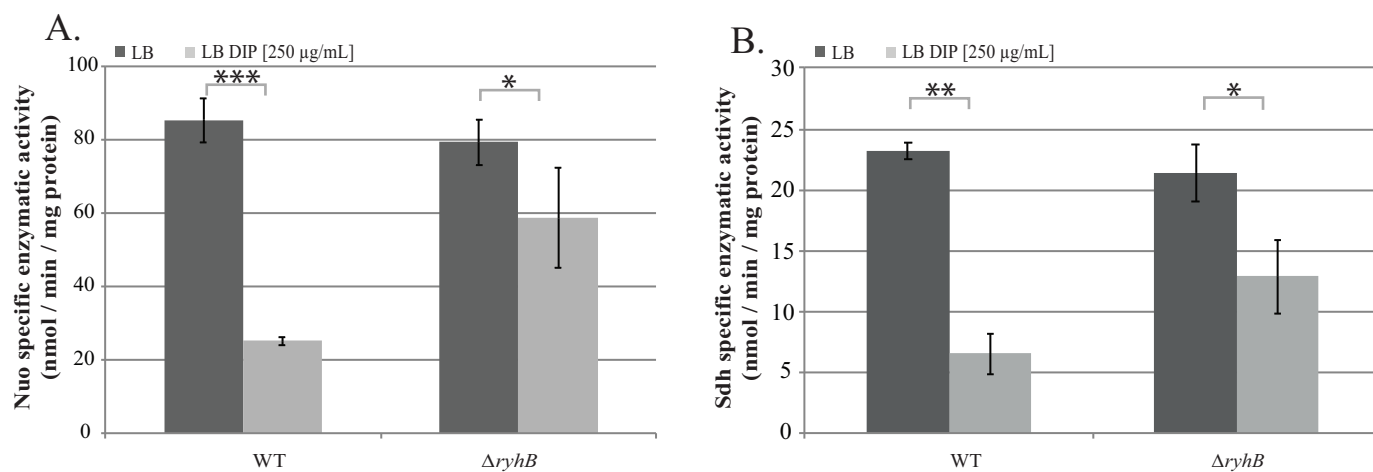

Figure 3.



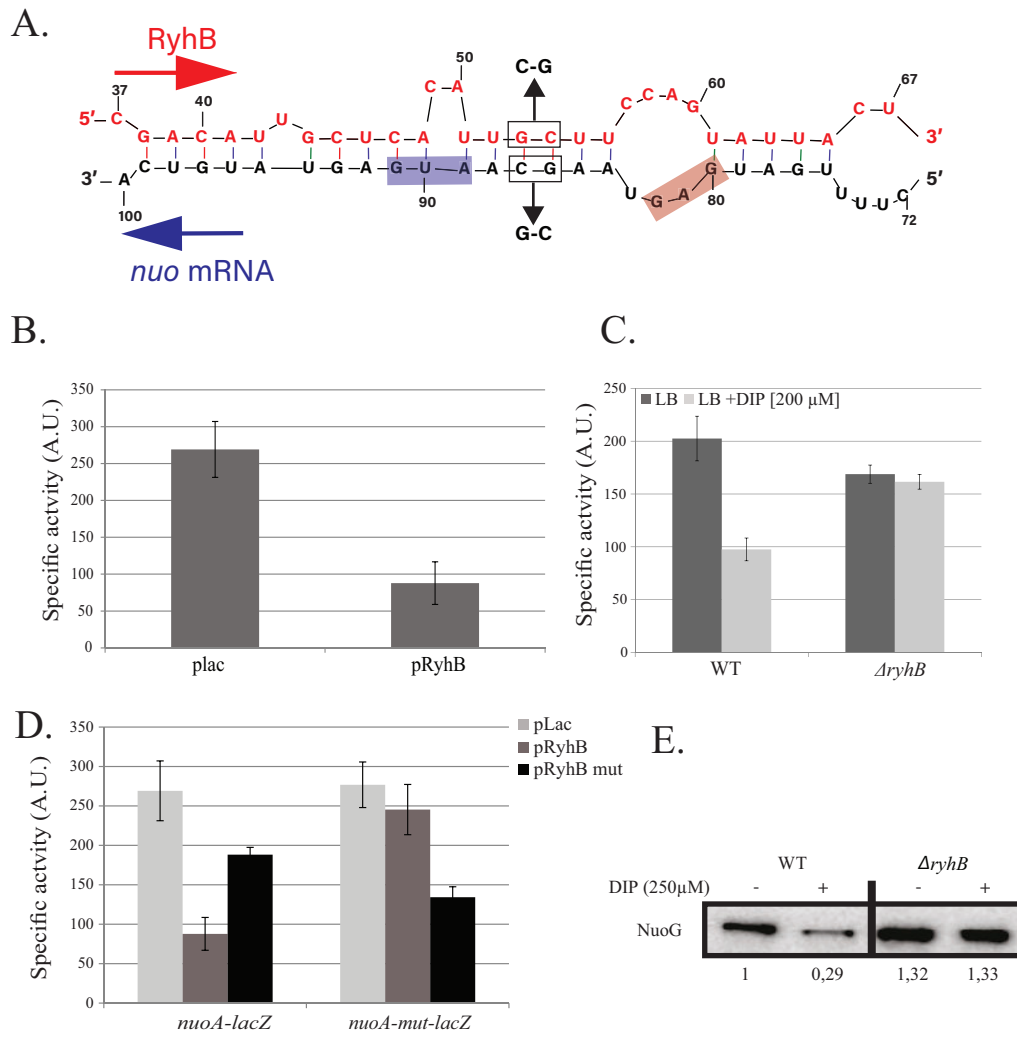

Figure 4.

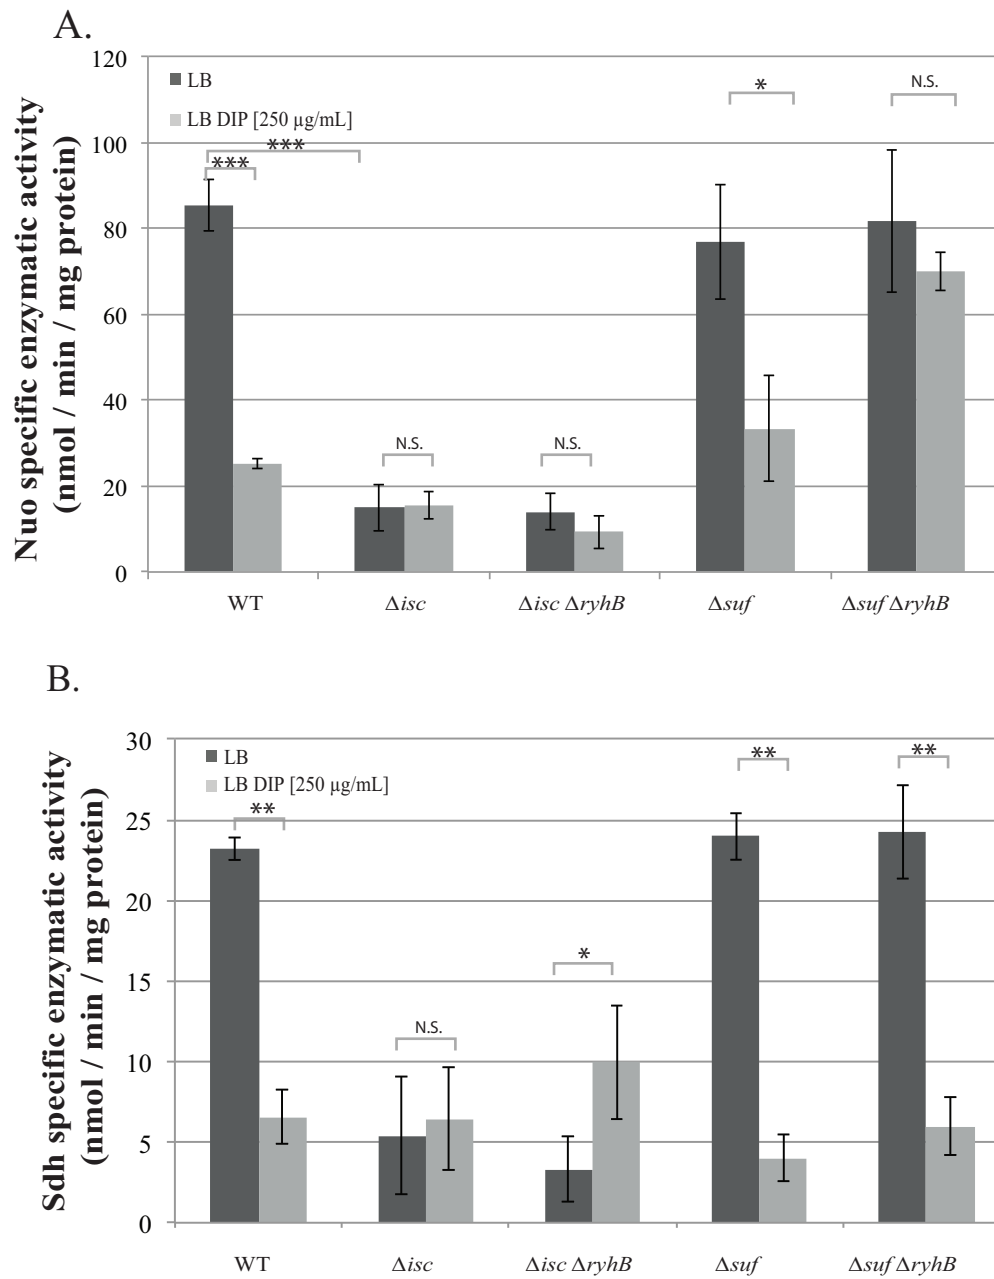

Figure 5.

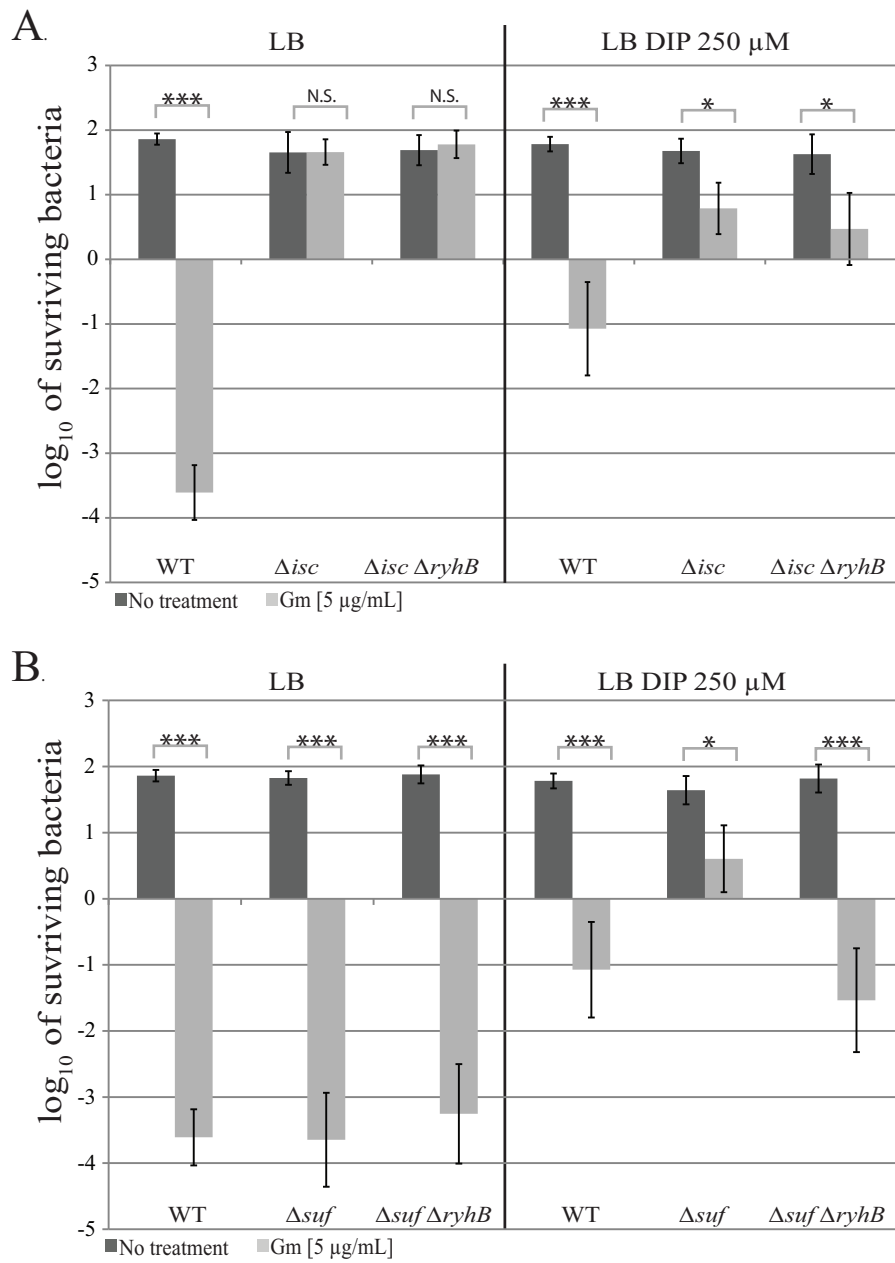

Figure 6.

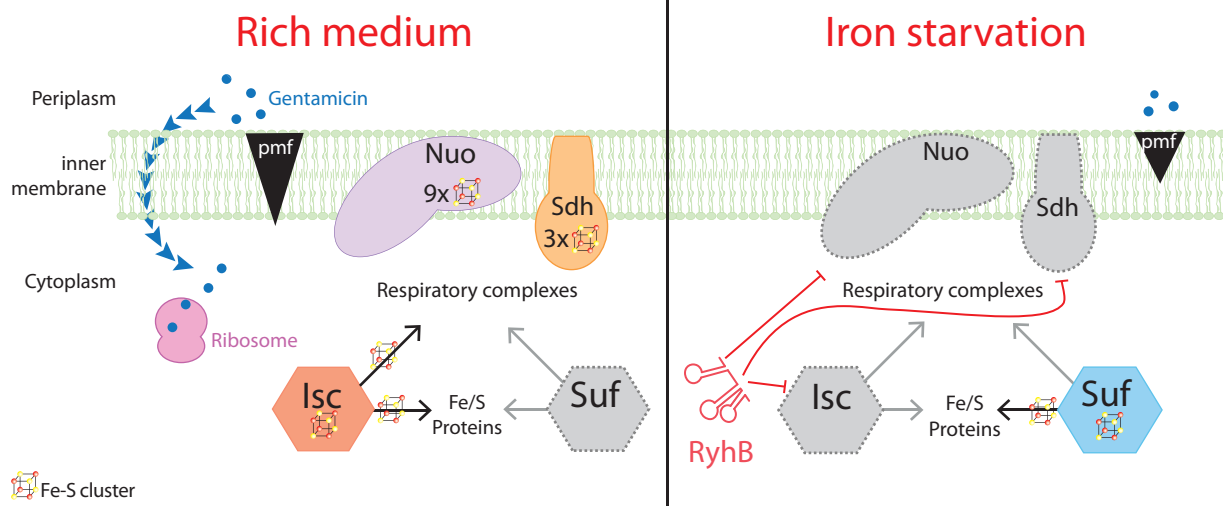

Figure 7.
